# Supplementary material
Source: PubMed Central journal article supplement (PMC3043227)

# Enhancement of HIV-1 infectivity by simple, self-assembling modular peptides

David Easterhoff<sup>1,#</sup>, John T. M. DiMaio<sup>2,#</sup>, Todd M. Doran<sup>2</sup>, Stephen Dewhurst<sup>1,\*</sup>,  
Bradley L. Nilsson<sup>2,\*</sup>

From the Departments of <sup>1</sup>Microbiology and Immunology, and <sup>2</sup>Chemistry, University of Rochester, Rochester, NY 14627

## SUPPORTING MATERIAL

Contents:

|                                                                                                                                                  |            |
|--------------------------------------------------------------------------------------------------------------------------------------------------|------------|
| <b>Figure S1.</b> CD spectral analysis of cationic peptides in phosphate-buffered saline (PBS)                                                   | <b>S2</b>  |
| <b>Figure S2.</b> CD spectral analysis of anionic peptides in PBS                                                                                | <b>S3</b>  |
| <b>Figure S3.</b> Analytical HPLC trace (215 nm) of peptide Ac-K <sub>2</sub> (AKAE) <sub>2</sub> -NH <sub>2</sub>                               | <b>S4</b>  |
| <b>Figure S4.</b> Analytical HPLC trace (215 nm) of peptide Ac-K <sub>2</sub> (FKFE) <sub>2</sub> -NH <sub>2</sub>                               | <b>S4</b>  |
| <b>Figure S5.</b> Analytical HPLC trace (215 nm) of peptide Ac-K <sub>4</sub> (FKFE) <sub>2</sub> -NH <sub>2</sub>                               | <b>S4</b>  |
| <b>Figure S6.</b> Analytical HPLC trace (215 nm) of peptide Ac-K <sub>2</sub> (ChaKChaE) <sub>2</sub> -NH <sub>2</sub>                           | <b>S5</b>  |
| <b>Figure S7.</b> Analytical HPLC trace (215 nm) of peptide Ac-K <sub>4</sub> (ChaKChaE) <sub>2</sub> -NH <sub>2</sub>                           | <b>S5</b>  |
| <b>Figure S8.</b> Analytical HPLC trace (215 nm) of peptide Ac-E <sub>2</sub> (FKFE) <sub>2</sub> -NH <sub>2</sub>                               | <b>S5</b>  |
| <b>Figure S9.</b> Analytical HPLC trace (215 nm) of peptide Ac-E <sub>4</sub> (FKFE) <sub>2</sub> -NH <sub>2</sub>                               | <b>S6</b>  |
| <b>Figure S10.</b> Analytical HPLC trace (215 nm) of peptide Ac-E <sub>2</sub> (ChaKChaE) <sub>2</sub> -NH <sub>2</sub>                          | <b>S6</b>  |
| <b>Figure S11.</b> Analytical HPLC trace (215 nm) of peptide Ac-E <sub>4</sub> (ChaKChaE) <sub>2</sub> -NH <sub>2</sub>                          | <b>S6</b>  |
| <b>Table S1.</b> Analytical HPLC conditions of peptides <b>1-9</b>                                                                               | <b>S7</b>  |
| <b>Figure S12.</b> MALDI mass spectrum of Ac-K <sub>2</sub> (AKAE) <sub>2</sub> -NH <sub>2</sub>                                                 | <b>S8</b>  |
| <b>Figure S13.</b> MALDI mass spectrum of Ac-K <sub>2</sub> (FKFE) <sub>2</sub> -NH <sub>2</sub>                                                 | <b>S8</b>  |
| <b>Figure S14.</b> MALDI mass spectrum of Ac-K <sub>4</sub> (FKFE) <sub>2</sub> -NH <sub>2</sub>                                                 | <b>S9</b>  |
| <b>Figure S15.</b> MALDI mass spectrum of Ac-K <sub>2</sub> (ChaKChaE) <sub>2</sub> -NH <sub>2</sub>                                             | <b>S9</b>  |
| <b>Figure S16.</b> MALDI mass spectrum of Ac-K <sub>4</sub> (ChaKChaE) <sub>2</sub> -NH <sub>2</sub>                                             | <b>S10</b> |
| <b>Figure S17.</b> MALDI mass spectrum of Ac-E <sub>2</sub> (FKFE) <sub>2</sub> -NH <sub>2</sub>                                                 | <b>S10</b> |
| <b>Figure S18.</b> MALDI mass spectrum of Ac-E <sub>4</sub> (FKFE) <sub>2</sub> -NH <sub>2</sub>                                                 | <b>S11</b> |
| <b>Figure S19.</b> MALDI mass spectrum of Ac-E <sub>2</sub> (ChaKChaE) <sub>2</sub> -NH <sub>2</sub>                                             | <b>S11</b> |
| <b>Figure S20.</b> MALDI mass spectrum of Ac-E <sub>4</sub> (ChaKChaE) <sub>2</sub> -NH <sub>2</sub>                                             | <b>S12</b> |
| <b>Figure S21.</b> Visible appearance of peptide supramolecular assemblies.                                                                      | <b>S13</b> |
| <b>Figure S22.</b> TEM images of peptide supramolecular assemblies, before and after removal of insoluble material by centrifugal sedimentation. | <b>S14</b> |
| <b>Figure S23.</b> Cationic peptide supramolecular assemblies efficiently enhance low dose HIV-1 infection.                                      | <b>S16</b> |
| <b>Figure S24.</b> Cationic and anionic supramolecular assemblies are not cytotoxic                                                              | <b>S17</b> |

**Figure S1.** (A-E) The cationic peptides were examined via CD in phosphate buffered saline in parallel to the experiments performed in unbuffered water. **A-D** all exhibit characteristics of  $\beta$ -sheet assemblies without the addition of NaCl (other than that already present in the buffer). **E** exhibited characteristics of a unordered structure orientation. All peptides were at 300  $\mu$ M. (A) Ac-K<sub>2</sub>(FKFE)<sub>2</sub>-NH<sub>2</sub>. (B) Ac-K<sub>4</sub>(FKFE)<sub>2</sub>-NH<sub>2</sub>. (C) Ac-K<sub>2</sub>(ChaKChaE)<sub>2</sub>-NH<sub>2</sub>. (D) Ac-K<sub>4</sub>(ChaKChaE)<sub>2</sub>-NH<sub>2</sub>. (E) Ac-K<sub>2</sub>(AKAE)<sub>2</sub>-NH<sub>2</sub>.

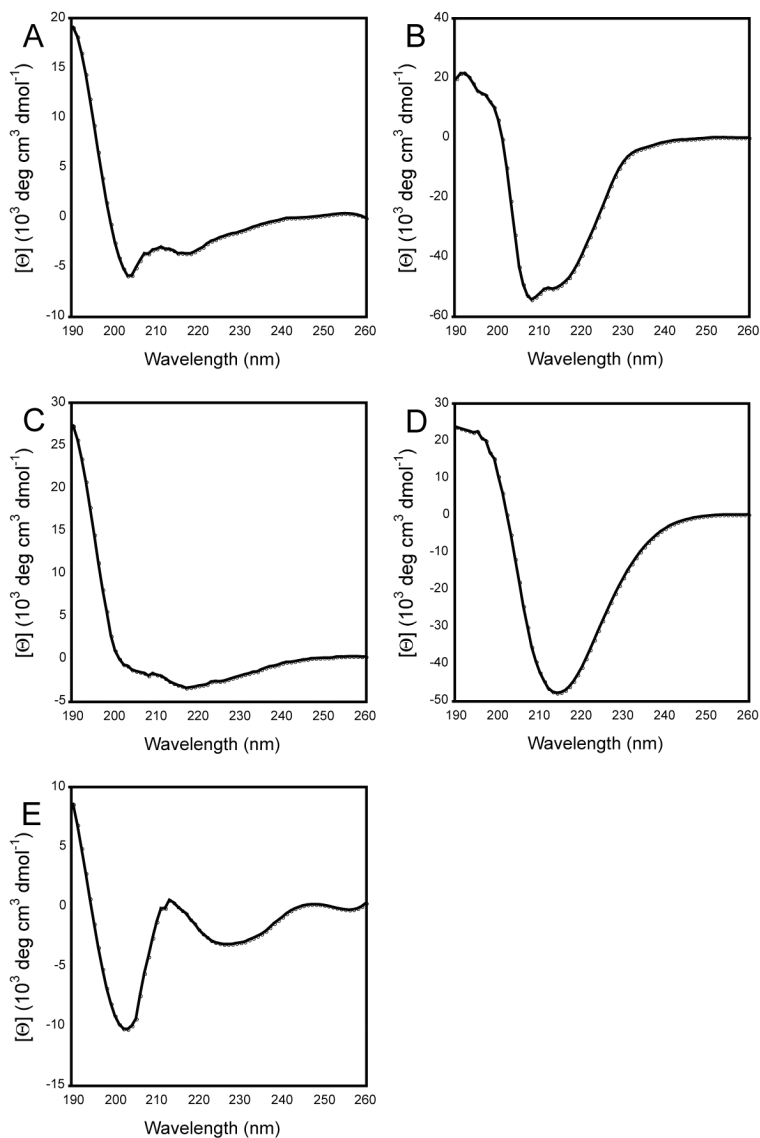

**Figure S2.** (A-D) The anionic peptides were examined via CD in phosphate buffered saline to parallel the experiments performed in unbuffered water. **A**, **C**, and **D** all exhibited characteristics of  $\beta$ -sheet assemblies without the addition of NaCl (other than that already present in the buffer). **B** initially showed evidence of an unordered structure, however, after addition of NaCl there was evidence of  $\beta$ -sheet assembly, which is consistent with the previous experiments. All peptides were at 300  $\mu$ M. (A) Ac-E<sub>2</sub>(FKFE)<sub>2</sub>-NH<sub>2</sub>. (B) Ac-E<sub>4</sub>(FKFE)<sub>2</sub>-NH<sub>2</sub>. (C) Ac-E<sub>2</sub>(ChaKChaE)<sub>2</sub>-NH<sub>2</sub>. (D) Ac-E<sub>4</sub>(ChaKChaE)<sub>2</sub>-NH<sub>2</sub>.

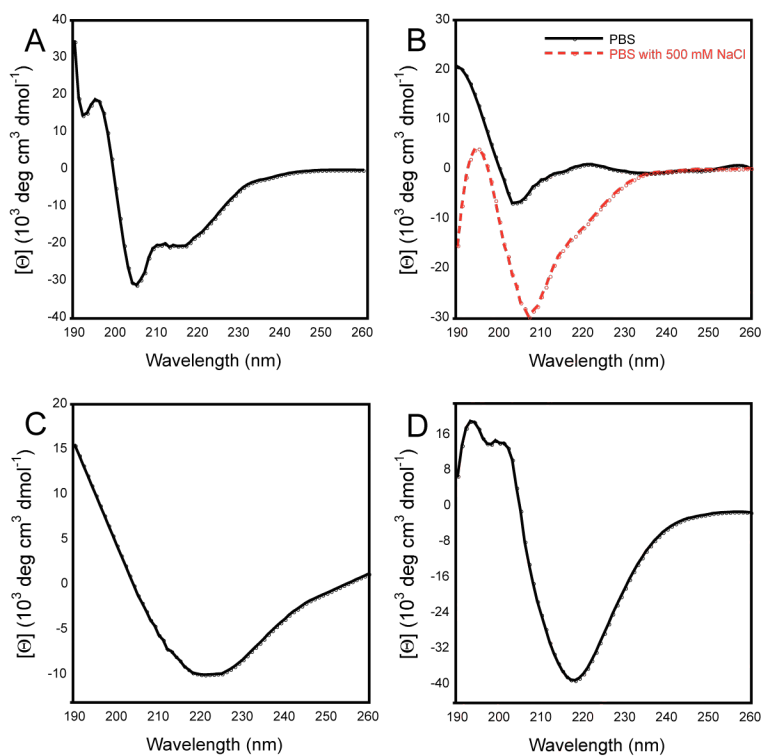

**Figure S3.** Analytical HPLC trace (215 nm) of Ac-K<sub>2</sub>(AKAE)<sub>2</sub>-NH<sub>2</sub>.

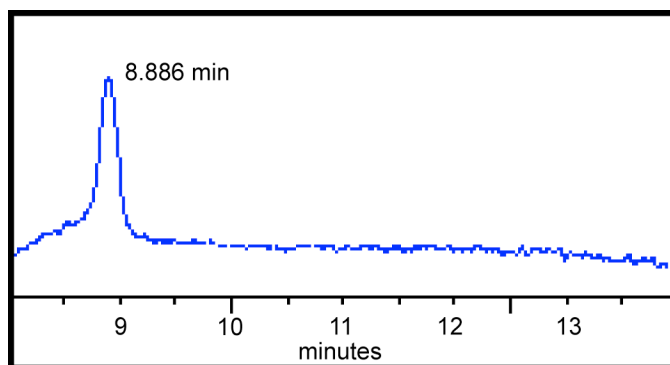

**Figure S4.** Analytical HPLC trace (215 nm) of Ac-K<sub>2</sub>(FKFE)<sub>2</sub>-NH<sub>2</sub>.

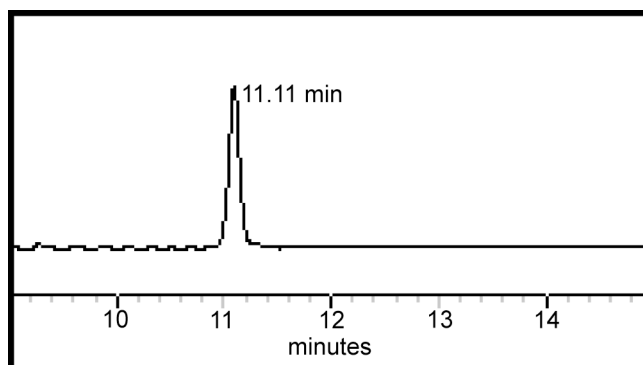

**Figure S5.** Analytical HPLC trace (215 nm) of Ac-K<sub>4</sub>(FKFE)<sub>2</sub>-NH<sub>2</sub>.

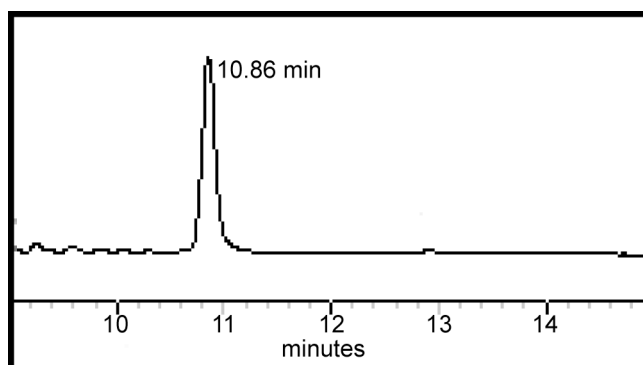



**Figure S6.** Analytical HPLC trace (215 nm) of Ac-K<sub>2</sub>(ChaKChaE)<sub>2</sub>-NH<sub>2</sub>.

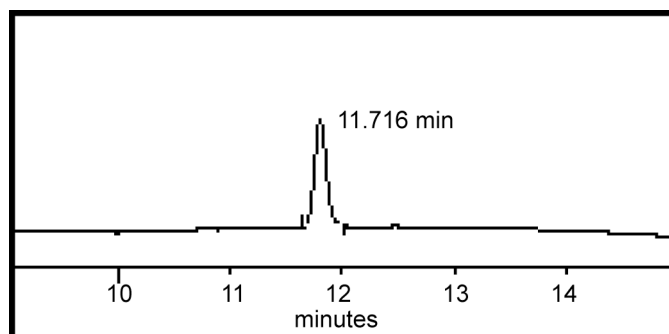

**Figure S7.** Analytical HPLC trace (215 nm) of Ac-K<sub>4</sub>(ChaKChaE)<sub>2</sub>-NH<sub>2</sub>.

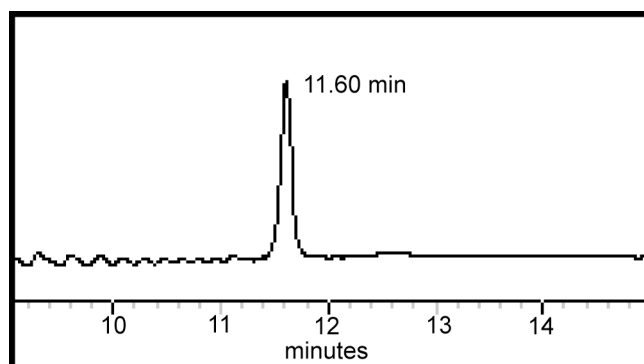

**Figure S8.** Analytical HPLC trace (215 nm) of Ac-E<sub>2</sub>(FKFE)<sub>2</sub>-NH<sub>2</sub>.

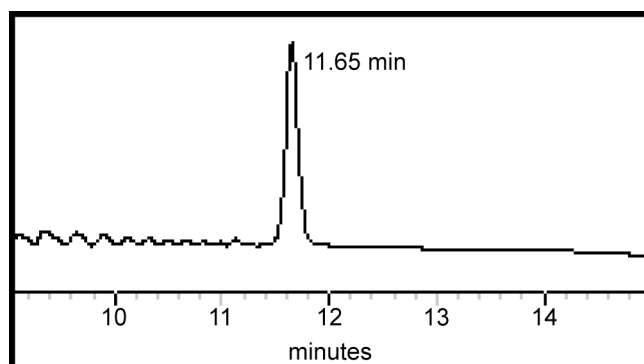

**Figure S9.** Analytical HPLC trace (215 nm) of Ac-E<sub>4</sub>(FKFE)<sub>2</sub>-NH<sub>2</sub>.

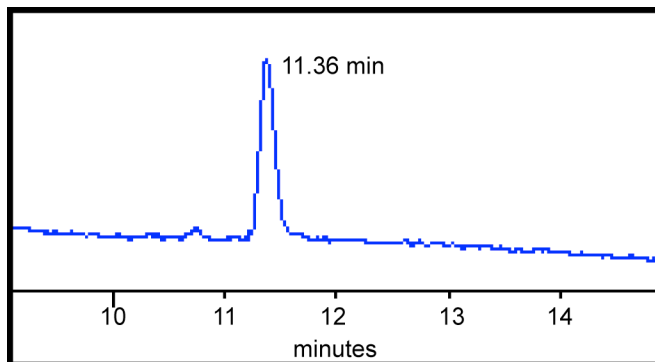

**Figure S10.** Analytical HPLC trace (215 nm) of Ac-E<sub>2</sub>(ChaKChaE)<sub>2</sub>-NH<sub>2</sub>.

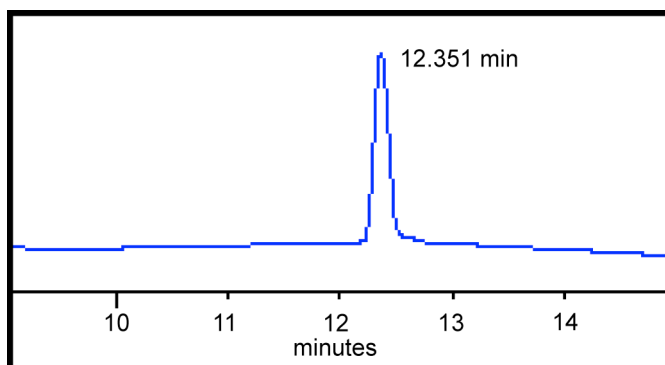

**Figure S11.** Analytical HPLC trace (215 nm) of Ac-E<sub>4</sub>(ChaKChaE)<sub>2</sub>-NH<sub>2</sub>.

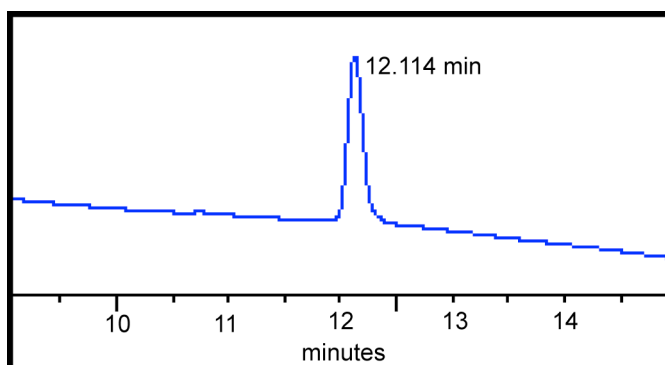

**Table S1.** Analytical HPLC conditions for peptides 1-9.

| <b>Peptide</b> | <b>Sequence</b>                                            | <b>Retention Time (min)</b> | <b>Gradient (soln A: water/0.5% TFA; soln B: acetonitrile/0.5% TFA)</b>     |
|----------------|------------------------------------------------------------|-----------------------------|-----------------------------------------------------------------------------|
| 1              | Ac-K <sub>2</sub> (FKFE) <sub>2</sub> -NH <sub>2</sub>     | 11.11                       | Isocratic 5% <b>B</b> 5 min, 5-95% <b>B</b> over 10 min, 95% <b>B</b> 5 min |
| 2              | Ac-K <sub>4</sub> (FKFE) <sub>2</sub> -NH <sub>2</sub>     | 10.86                       | Isocratic 5% <b>B</b> 5 min, 5-95% <b>B</b> over 10 min, 95% <b>B</b> 5 min |
| 3              | Ac-K <sub>2</sub> (ChaKChaE) <sub>2</sub> -NH <sub>2</sub> | 11.716                      | Isocratic 5% <b>B</b> 5 min, 5-95% <b>B</b> over 10 min, 95% <b>B</b> 5 min |
| 4              | Ac-K <sub>4</sub> (ChaKChaE) <sub>2</sub> -NH <sub>2</sub> | 11.60                       | Isocratic 5% <b>B</b> 5 min, 5-95% <b>B</b> over 10 min, 95% <b>B</b> 5 min |
| 5              | Ac-K <sub>2</sub> (AKAE) <sub>2</sub> -NH <sub>2</sub>     | 8.886                       | Isocratic 5% <b>B</b> 5 min, 5-95% <b>B</b> over 10 min, 95% <b>B</b> 5 min |
| 6              | Ac-E <sub>2</sub> (FKFE) <sub>2</sub> -NH <sub>2</sub>     | 11.65                       | Isocratic 5% <b>B</b> 5 min, 5-95% <b>B</b> over 10 min, 95% <b>B</b> 5 min |
| 7              | Ac-E <sub>4</sub> (FKFE) <sub>2</sub> -NH <sub>2</sub>     | 11.36                       | Isocratic 5% <b>B</b> 5 min, 5-95% <b>B</b> over 10 min, 95% <b>B</b> 5 min |
| 8              | Ac-E <sub>2</sub> (ChaKChaE) <sub>2</sub> -NH <sub>2</sub> | 12.351                      | Isocratic 5% <b>B</b> 5 min, 5-95% <b>B</b> over 10 min, 95% <b>B</b> 5 min |
| 9              | Ac-E <sub>4</sub> (ChaKChaE) <sub>2</sub> -NH <sub>2</sub> | 12.114                      | Isocratic 5% <b>B</b> 5 min, 5-95% <b>B</b> over 10 min, 95% <b>B</b> 5 min |



**Figure S12.** MALDI mass spectrum of Ac-K<sub>2</sub>(AKAE)<sub>2</sub>-NH<sub>2</sub>.

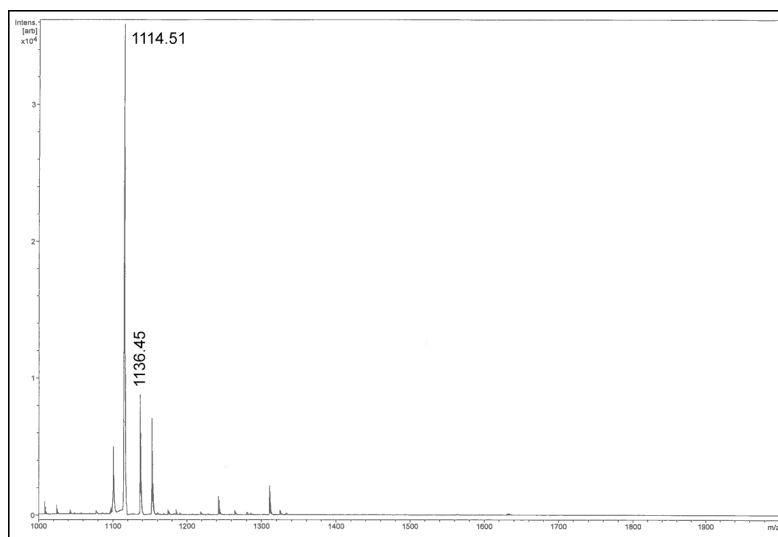

**Figure S13.** MALDI mass spectrum of Ac-K<sub>2</sub>(FKFE)<sub>2</sub>-NH<sub>2</sub>.

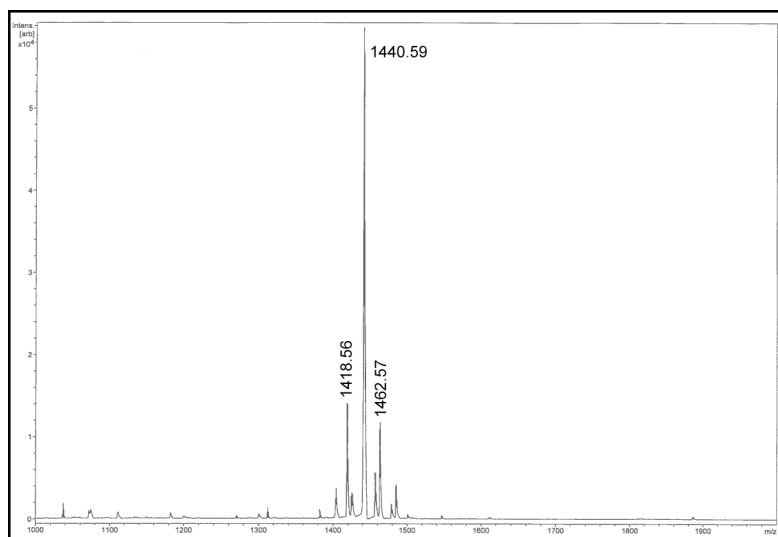

**Figure S14.** MALDI mass spectrum of Ac-K<sub>4</sub>(FKFE)<sub>2</sub>-NH<sub>2</sub>.

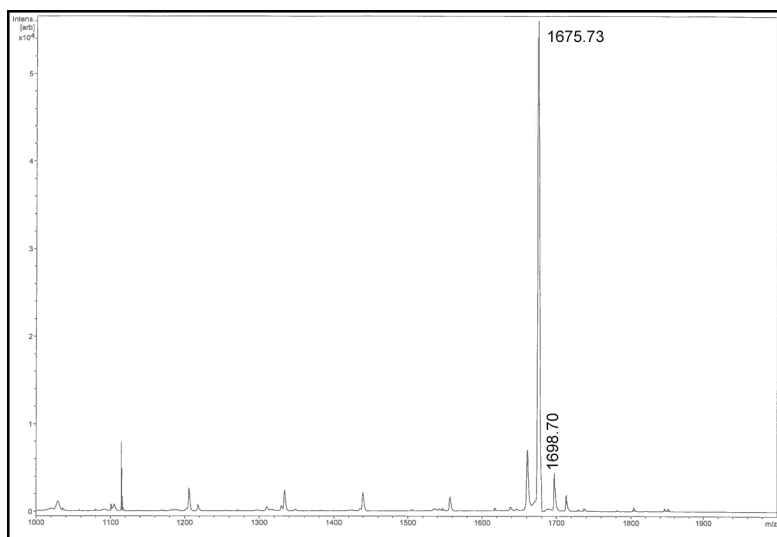

**Figure S15.** MALDI mass spectrum of Ac-K<sub>2</sub>(ChaKChaE)<sub>2</sub>-NH<sub>2</sub>.

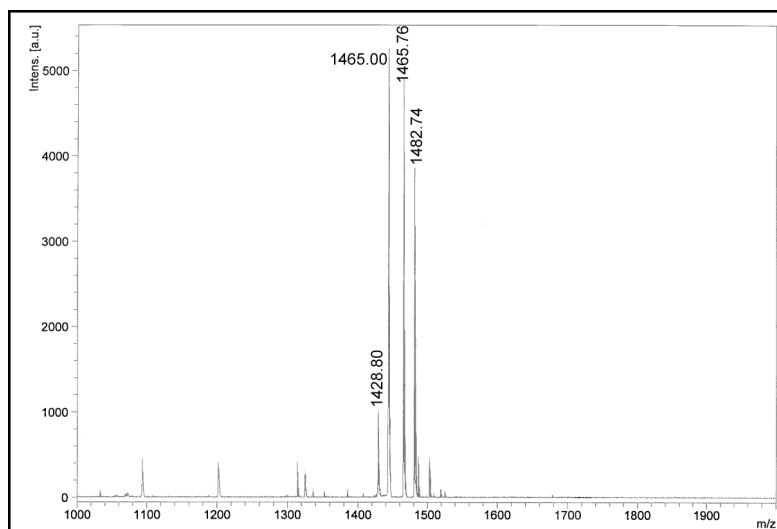

**Figure S16.** MALDI mass spectrum of Ac-K<sub>4</sub>(ChaKChaE)<sub>2</sub>-NH<sub>2</sub>.

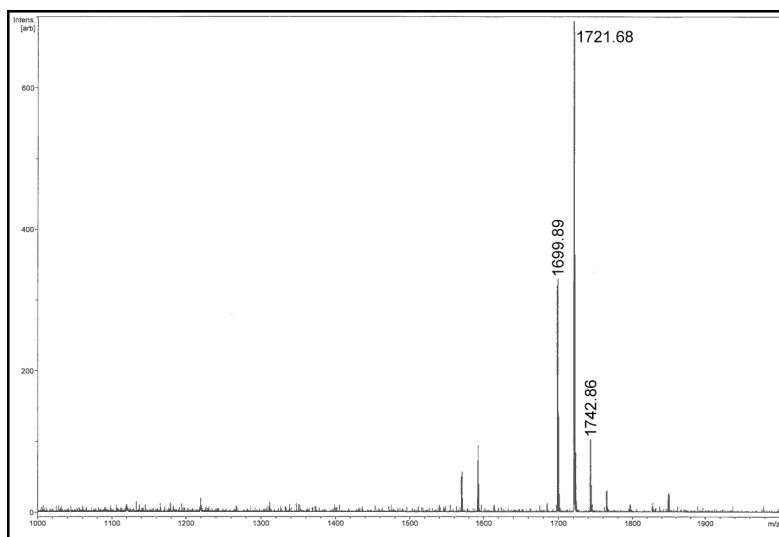

**Figure S17.** MALDI mass spectrum of Ac-E<sub>2</sub>(FKFE)<sub>2</sub>-NH<sub>2</sub>.

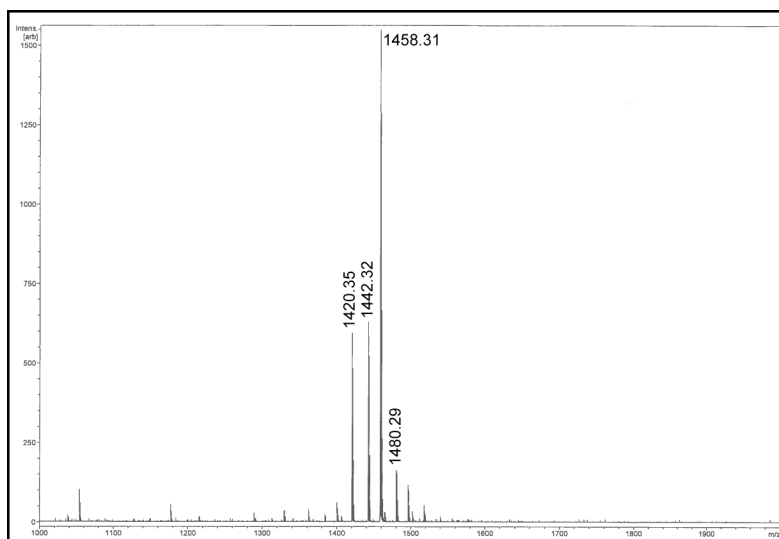

**Figure S18.** MALDI mass spectrum of Ac-E<sub>4</sub>(FKFE)<sub>2</sub>-NH<sub>2</sub>.

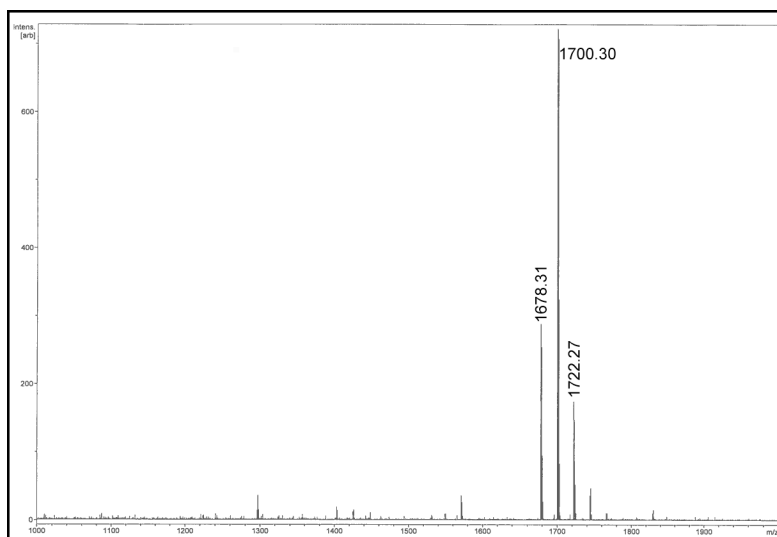

**Figure S19.** MALDI mass spectrum of Ac-E<sub>2</sub>(ChaKChaE)<sub>2</sub>-NH<sub>2</sub>.

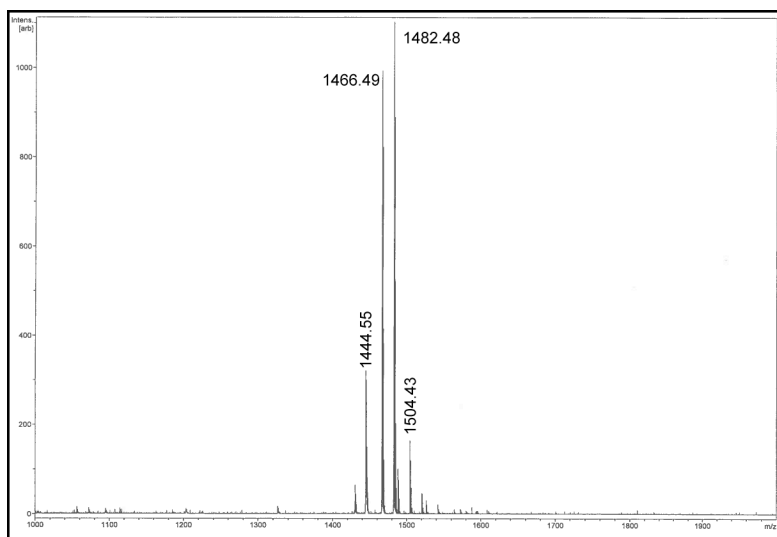

**Figure S20.** MALDI mass spectrum of Ac-E<sub>4</sub>(ChaKChaE)<sub>2</sub>-NH<sub>2</sub>.

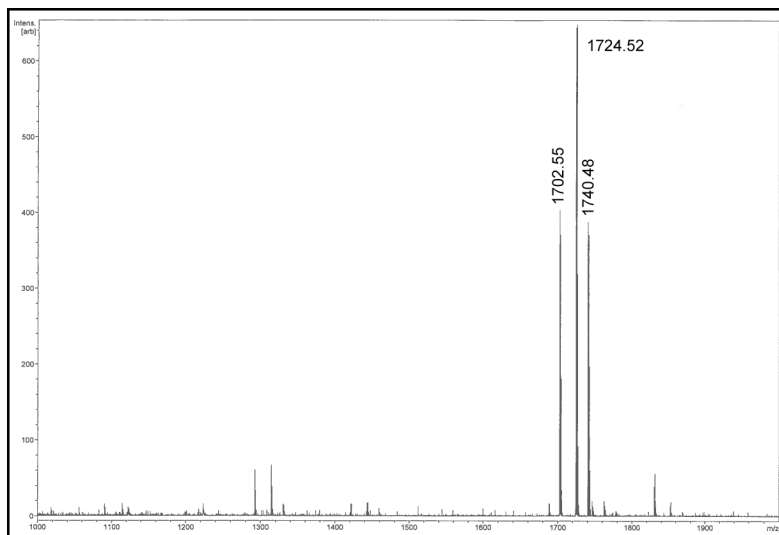

**Figure S21. Visible appearance of peptide supramolecular assemblies.** Glass vials containing supramolecular assemblies formed by  $K_n(XKXE)_2$  and  $E_4(\text{ChaKChaE})_2$  test peptides and SEVI fibrils (assemblies of the PAP[248-286] peptide) are shown. All provide visual evidence of solubility except for SEVI fibrils (assemblies of the PAP[248-286] peptide), which are turbid. Peptides are as follows:

(A) SEVI fibrils in PBS: [peptide] = 1.33 mM, [NaCl] = 150 mM

(B)  $K_2(\text{FKFE})_2$  in deionized water: [peptide] = 1 mM, [NaCl] = 300 mM;

(C)  $K_4(\text{FKFE})_2$  in deionized water: [peptide] = 1 mM, [NaCl] = 300 mM;

(D)  $K_2(\text{ChaKChaE})_2$  in deionized water: [peptide] = 1 mM, [NaCl] = 300 mM;

(E)  $K_4(\text{ChaKChaE})_2$  in deionized water: [peptide] = 1 mM, [NaCl] = 300 mM;

(F)  $E_4(\text{ChaKChaE})_2$  in deionized water: [peptide] = 938  $\mu\text{M}$ , [NaCl] = 300 mM, pH 7.

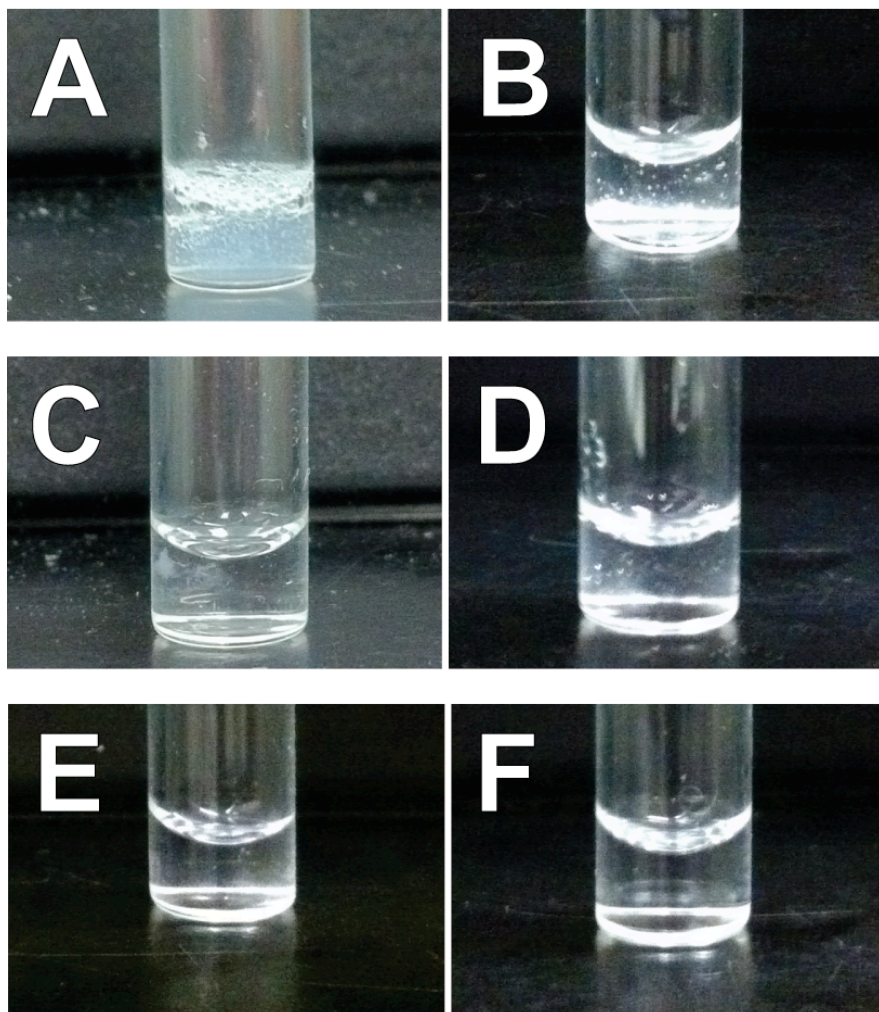

**Figure S22. TEM images of peptide supramolecular assemblies, before and after removal of insoluble material by centrifugal sedimentation.** TEM images are shown of supramolecular assemblies formed by  $K_n(XKXE)_2$  and  $E_4(\text{ChaKChaE})_2$  test peptides and SEVI fibrils (assemblies of the PAP[248-286] peptide), either before or after high-speed centrifugation to remove sedimentable (insoluble) material. **(A-F):** Peptide stock peptide solutions were agitated and then imaged by transmission electron microscopy. **(G-L):** Peptide stock solutions were centrifuged at 14000 rpm at 4°C for 30 min. A portion of the supernatant material was then imaged by TEM. All the images show the presence of fibrils, regardless of centrifugal sedimentation of insoluble material, except for SEVI (panel **G**). Images are as follows:

Images of agitated (resuspended) peptides/aggregates:

- (A)** SEVI fibrils in PBS: [peptide] = 1.33 mM, [NaCl] = 150 mM
- (B)**  $K_2(\text{FKFE})_2$  in deionized water: [peptide] = 1 mM, [NaCl] = 300 mM;
- (C)**  $K_4(\text{FKFE})_2$  in deionized water: [peptide] = 1 mM, [NaCl] = 300 mM;
- (D)**  $K_2(\text{ChaKChaE})_2$  in deionized water: [peptide] = 1 mM, [NaCl] = 300 mM;
- (E)**  $K_4(\text{ChaKChaE})_2$  in deionized water: [peptide] = 1 mM, [NaCl] = 300 mM;
- (F)**  $E_4(\text{ChaKChaE})_2$  in deionized water: [peptide] = 938  $\mu\text{M}$ , [NaCl] = 300 mM, pH 7.

Images of peptides/aggregates following centrifugal sedimentation of insoluble material:

- (G)** SEVI fibrils in PBS: [peptide] = 1.33 mM, [NaCl] = 150 mM
- (H)**  $K_2(\text{FKFE})_2$  in deionized water: [peptide] = 1 mM, [NaCl] = 300 mM;
- (I)**  $K_4(\text{FKFE})_2$  in deionized water: [peptide] = 1 mM, [NaCl] = 300 mM;
- (J)**  $K_2(\text{ChaKChaE})_2$  in deionized water: [peptide] = 1 mM, [NaCl] = 300 mM;
- (K)**  $K_4(\text{ChaKChaE})_2$  in deionized water: [peptide] = 1 mM, [NaCl] = 300 mM;
- (L)**  $E_4(\text{ChaKChaE})_2$  in deionized water: [peptide] = 938  $\mu\text{M}$ , [NaCl] = 300 mM, pH 7.

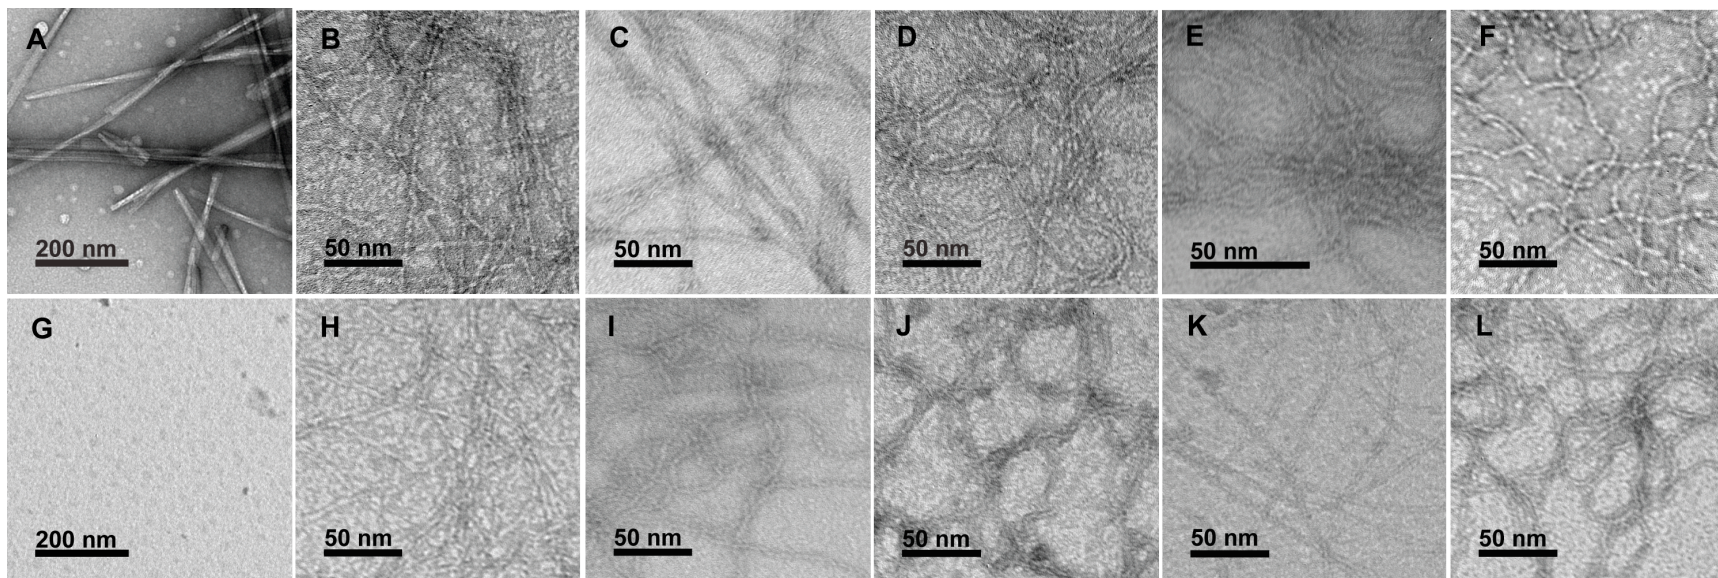



**Figure S23. Cationic peptide supramolecular assemblies efficiently enhance low dose HIV-1 infection.** CEMx M7 cells were infected with HIV-1 at a concentration 10-fold lower than that used in Figure 5 (i.e., at a concentration corresponding to 2.1 ng/mL of HIV-1 p24 antigen), in the presence of increasing concentrations of self-assembled peptides with (i) net positive charges (shown in red): SEVI,  $K_4(\text{FKFE})_2$ ,  $K_2(\text{FKFE})_2$ ,  $K_4(\text{ChaKChaE})_2$ ,  $K_2(\text{ChaKChaE})_2$ , (ii) net negative charges (shown in blue):  $E_4(\text{FKFE})_2$ ,  $E_2(\text{ChaKChaE})_2$ , and (iii) unassembled positively charged peptide (shown in orange):  $K_2(\text{AKAE})_2$ . At 48 hours post infection cells were harvested and luciferase measured as a read out of HIV-1 infection. Results represent mean values from three experimental replicates; error bars denote the standard deviation of these values. *Notes: (1) all peptide concentrations refer to final concentrations in cell culture (and not to concentrations during virion pre-incubation, which were higher); (2) we have plotted the data on a semi-log scale, to facilitate comparison of values obtained at low concentrations. Since the log of zero is not defined, we were obliged to use a discontinuous x-axis to do this. The far left portion of the x-axis is thus plotted with a linear (ordinary) axis, in order to accommodate the value  $x = \text{zero}$ .*

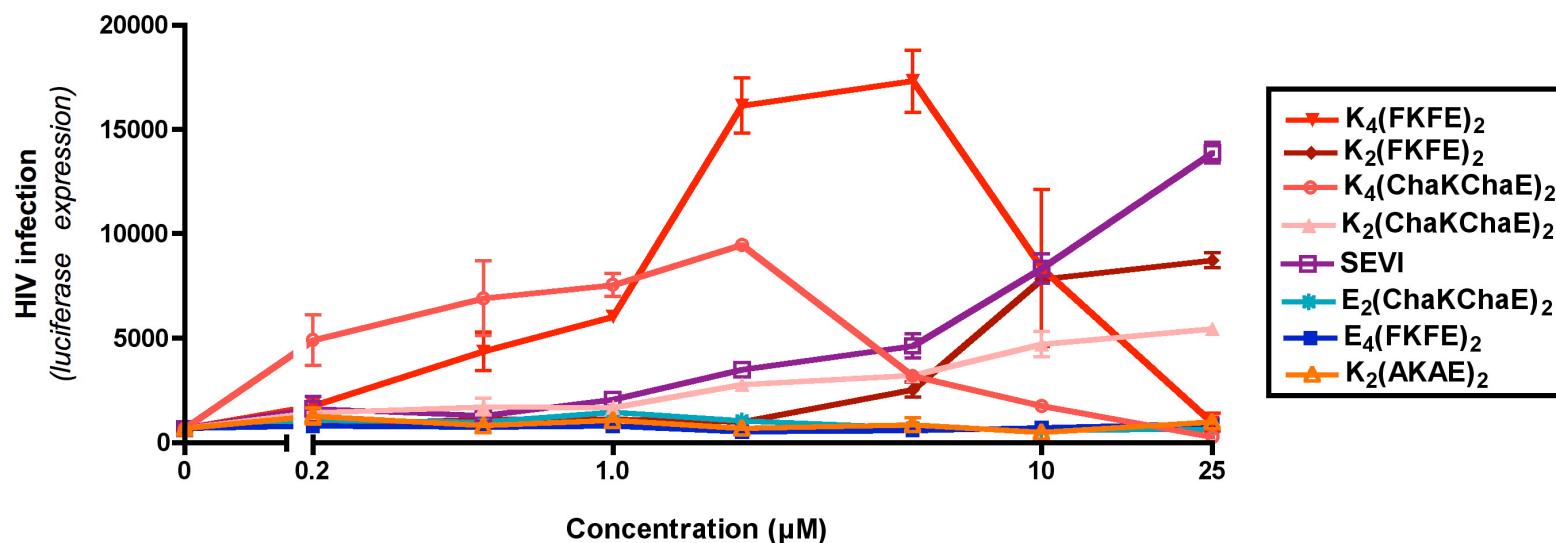

**Figure S24. Cationic and anionic supramolecular assemblies are not cytotoxic *in vitro*.** CEMx M7 cells were cultured for 24 hours (A) or 72 hours (B) in the continuous presence of increasing concentrations of fibrils (1, 10, 25  $\mu$ M) in RPMI-1640 growth media containing 10% Alamar Blue®. After 24 hours (A) or 72 hours (B) metabolic activity was measured spectrophotometrically. The fluorescence values for untreated cells were assigned as 100% viability, and values for treated cells were then normalized to this. Results represent mean values from three experimental replicates; error bars denote the standard deviation of these values.

A

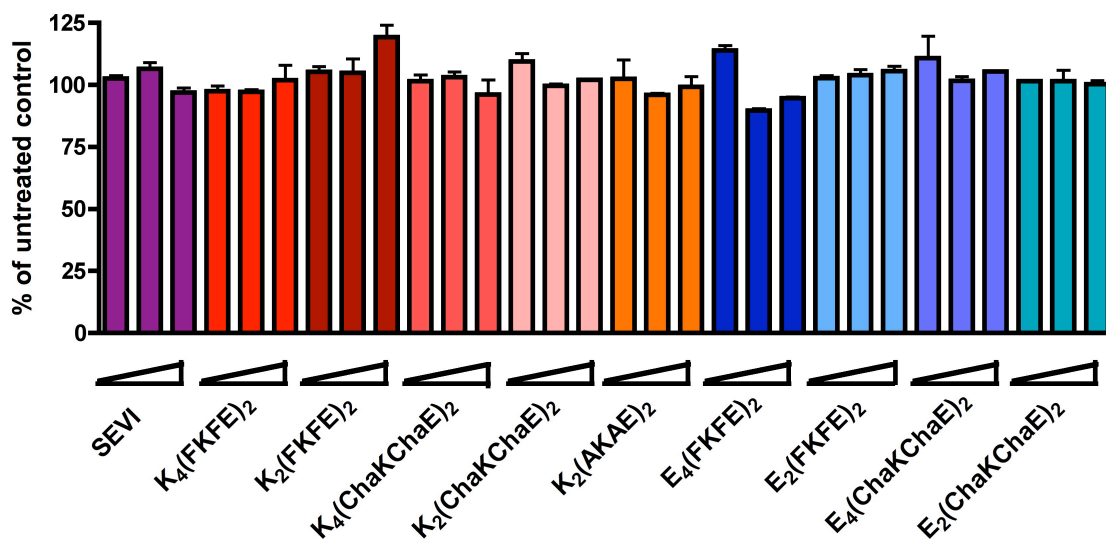

B

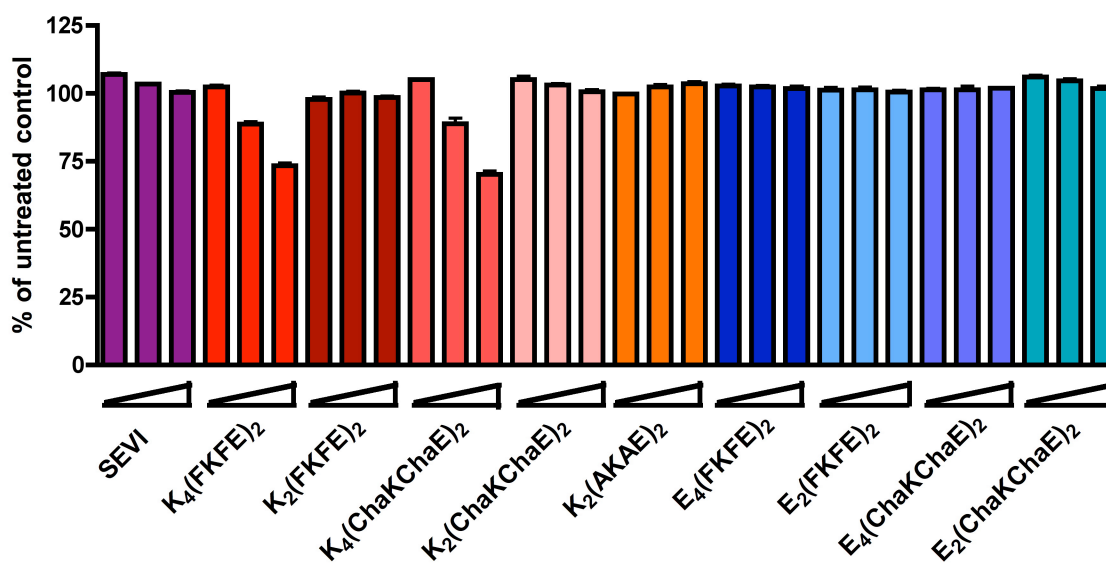

Supplement: mmc1.pdf [file mmc1.pdf]
